# Supplementary material
Source: PubMed Central journal article supplement (PMC3641597)
Supplement: cr201331x1.pdf [file cr201331x1.pdf]

A



C



B



**Figure S1** (A) Genotyping of WT and  $mSSB1^{F/F}$  MEFs untreated or treated with Adeno-Cre recombinase. Primers were used to amplify the 2kb WT allele, the 722bp  $mSSB1^{\Delta}$  allele and the 581bp  $mSSB1^F$  allele. (B) Detection of  $mSSB1$  and  $RNF41$  mRNA transcripts by RT-PCR in  $mSSB1^{F/F}$  and WT MEF treated with adeno-Cre virus for two days. GAPDH was used as RNA loading control for RT-PCR. (C)  $mSSB1$  transcript levels determined by RT-PCR in MEFs of the indicated genotypes.
