# Supplementary material
Source: PubMed Central journal article supplement (PMC3641597)
Supplement: cr201331x2.pdf [file cr201331x2.pdf]

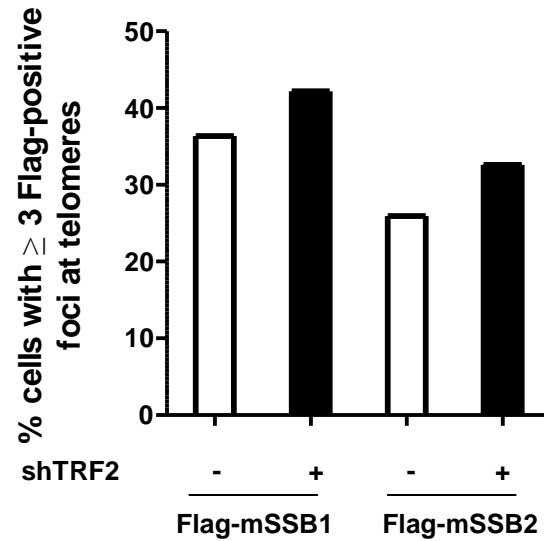

**Figure S2** Quantification of Flag-mSSB1 and Flag-mSSB2 localization to functional and uncapped telomeres devoid of TRF2. Telomere localization was assayed with anti-TRF1 antibody. Cells with 3 or more mSSB1/2-TRF1 positive foci were scored as positives.
