# Supplementary material
Source: PubMed Central journal article supplement (PMC3641597)
Supplement: cr201331x4.pdf [file cr201331x4.pdf]

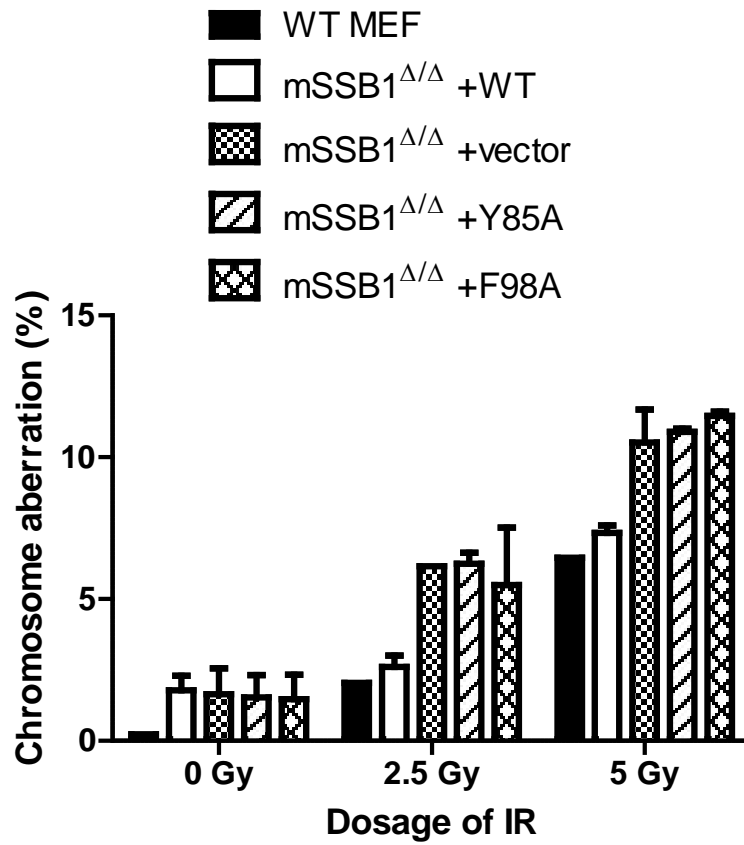

**Figure S4** Percentage of IR-induced chromosomal aberrations in WT MEFs and *mSSB1*<sup>Δ/Δ</sup> MEFs reconstituted with *mSSB1*<sub>WT</sub> or *mSSB1* mutant cDNAs. Mean values were derived from three independent experiments. Error bars: standard error of the means (s.e.m).
