# Supplementary material
Source: PubMed Central journal article supplement (PMC3641597)
Supplement: cr201331x5.pdf [file cr201331x5.pdf]

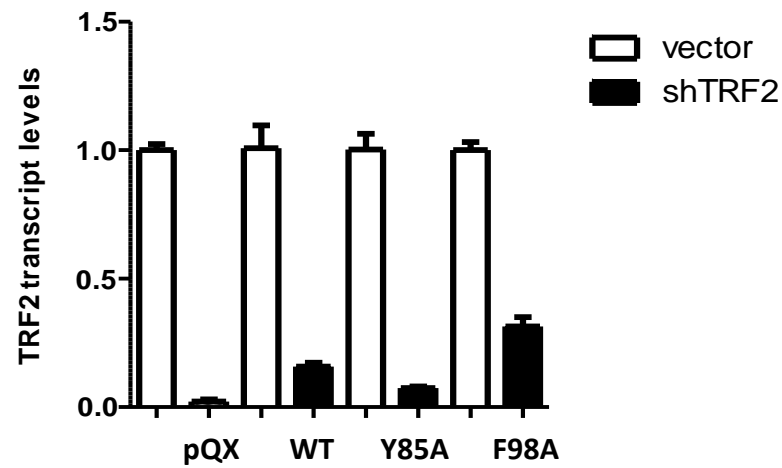

**Figure S5** TRF2 mRNA levels detected by real-time RT-PCR in *mSSB1*<sup>ΔΔ</sup> MEFs reconstituted with WT or mSSB1 mutants. Reconstituted MEFs were either untreated (vector) or treated with shRNA against TRF2. TRF2 transcript levels from vector treated cells were set as 100%.
