# Supplementary material
Source: PubMed Central journal article supplement (PMC3641597)
Supplement: cr201331x6.pdf [file cr201331x6.pdf]

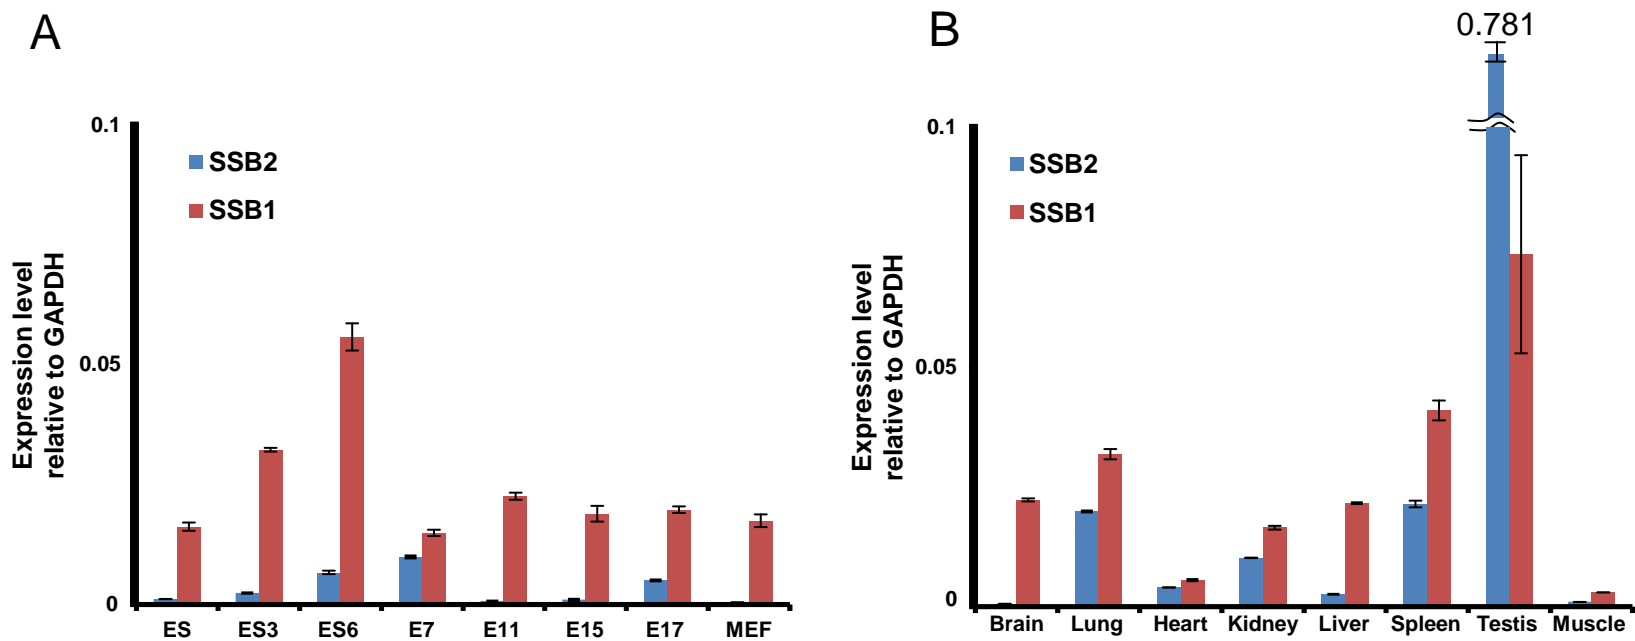

**Figure S6** Expression profiles of *mSSB1* and *mSSB2* transcripts during mouse development **A** and in different tissues from adult mice **B**. Total RNAs isolated from ES cells differentiated by addition of retinoic acid for days 0, 3, 6 days. In addition, RNA from day E7 to E17 embryos, E12.5 MEF and indicated adult tissues (Clonetechn RNA library) were subjected to quantitative RT-PCR. Experiments were performed in triplicate. Error bars: s.e.m.
