# Supplementary material
Source: PubMed Central journal article supplement (PMC3641597)
Supplement: cr201331x7.pdf [file cr201331x7.pdf]

A

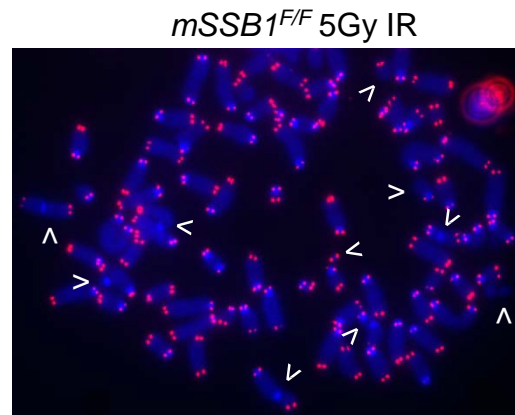

B

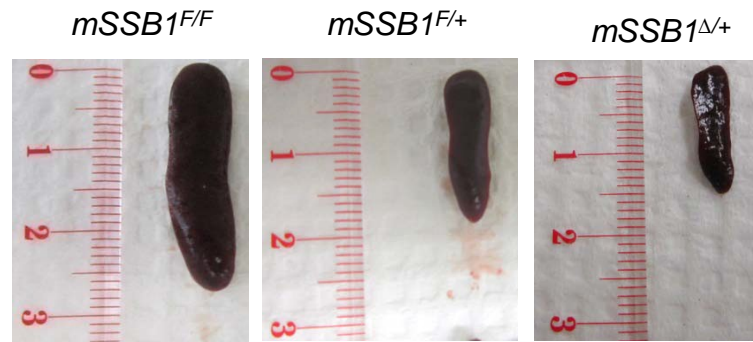

**Figure S7 (A)** Elevated number of fused chromosomes in *mSSB1<sup>F/F</sup>* MEFs treated with 5Gy IR. Arrows point to fused chromosomes. **(B)** Splens isolated from 24 week old mice of the indicated genotypes are shown.
